# Supplementary material for: Escape from neutralizing antibodies by SARS-CoV-2 spike protein variants
Source: eLife journal article supplement (doi:10.7554/elife.61312), 2020-10-28

# C144 passaged rVSV/SARS-CoV-2/GFP Populations

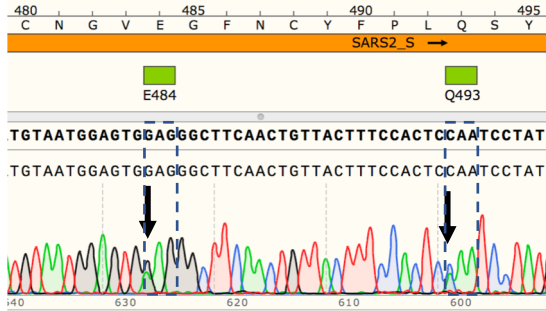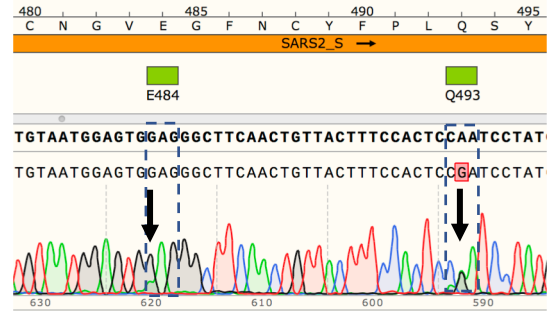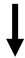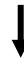

Mutant purification by limiting dilution

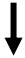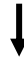

rVSV/SARS-CoV-2/GFP (E484K)

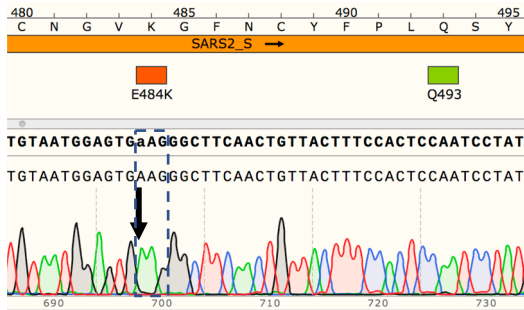

rVSV/SARS-CoV-2/GFP (Q493R)

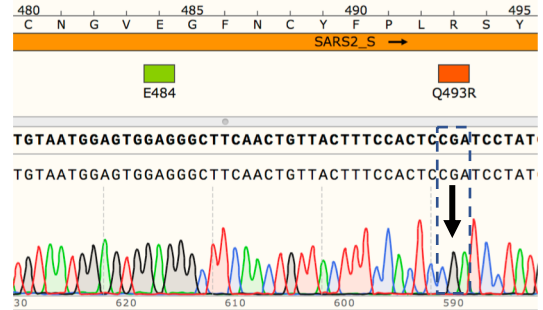

Supplement: supp [file elife-61312-supp-v1.zip]
