# Supplementary figures and images for: Escape from neutralizing antibodies by SARS-CoV-2 spike protein variants
Source: eLife journal article supplement (doi:10.7554/elife.61312), 2020-10-28

**A**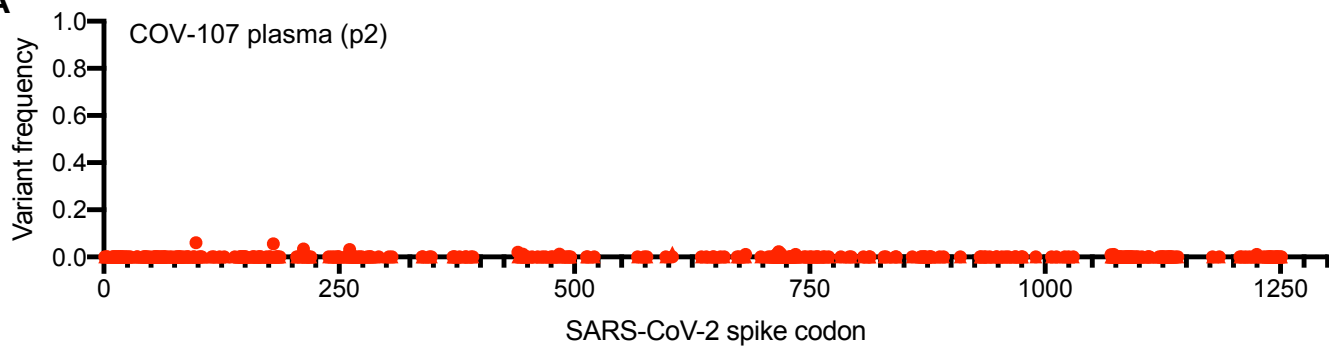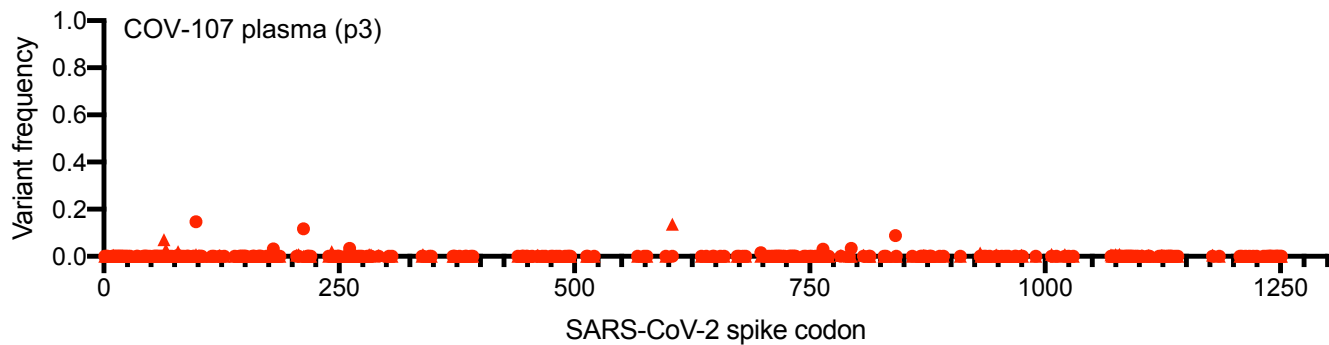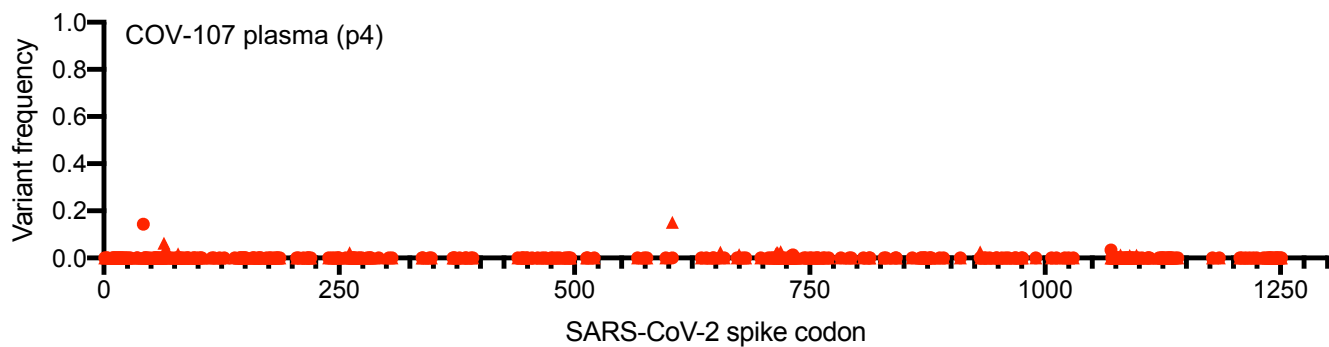**B**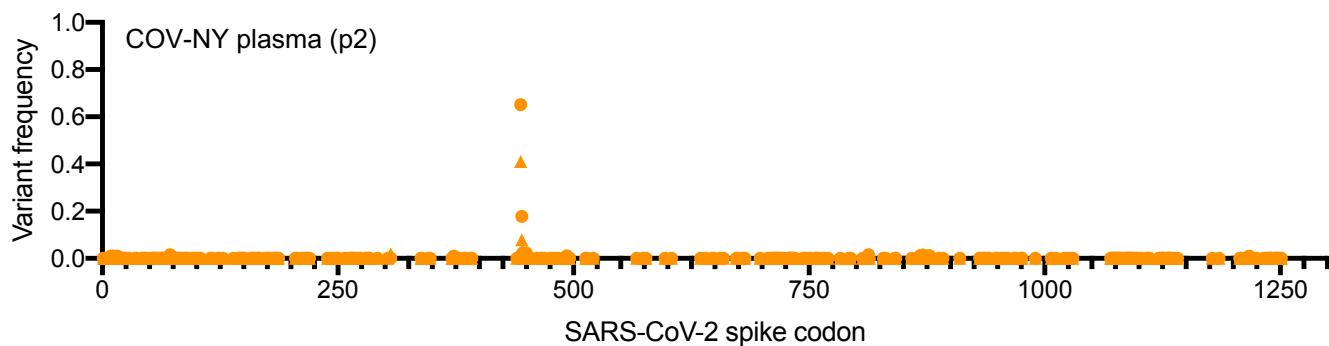

Supplement: supp [file elife-61312-supp-v1.zip]

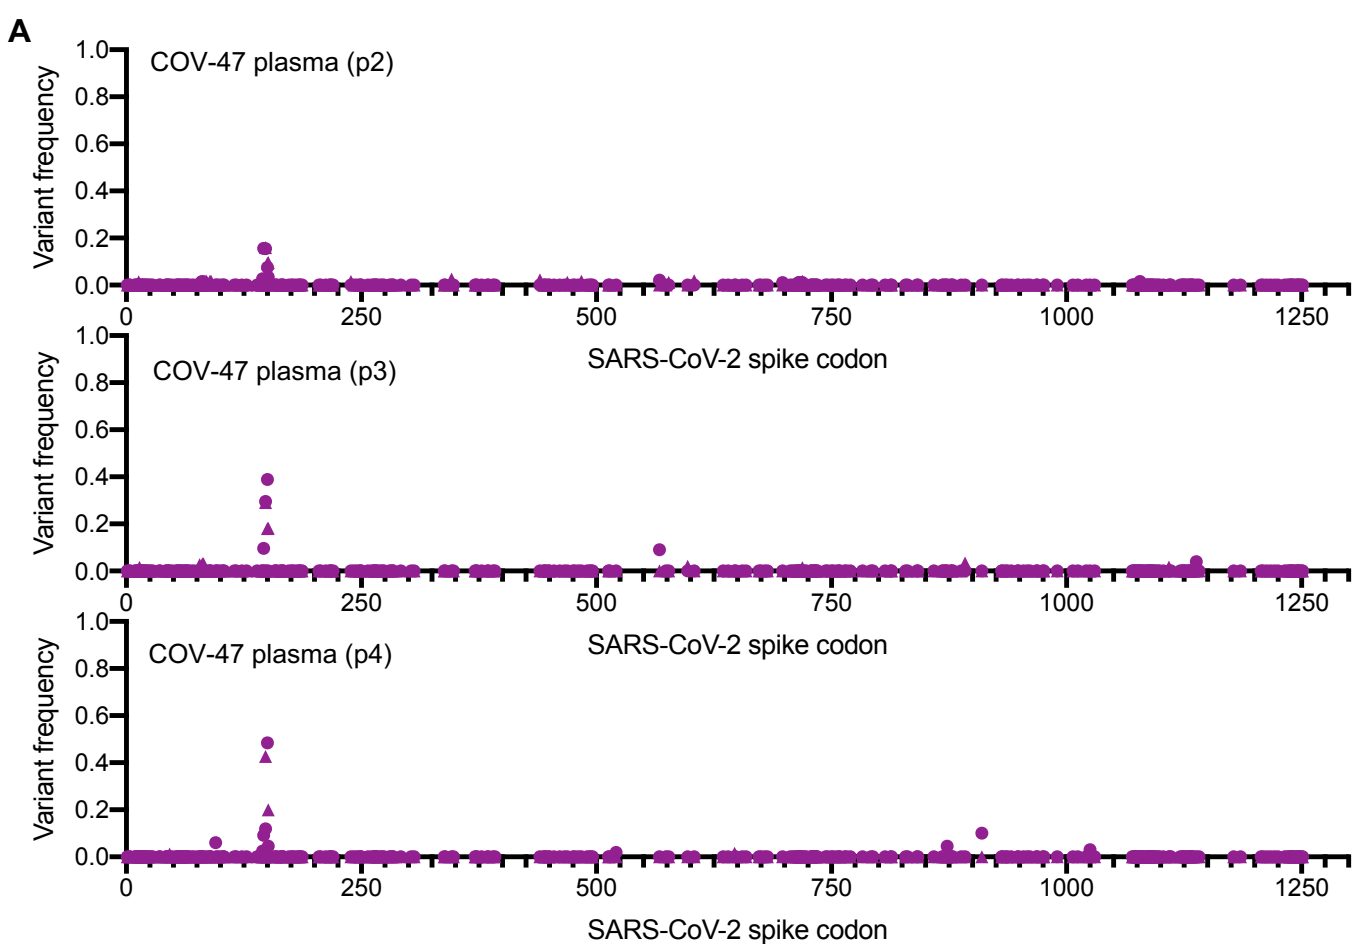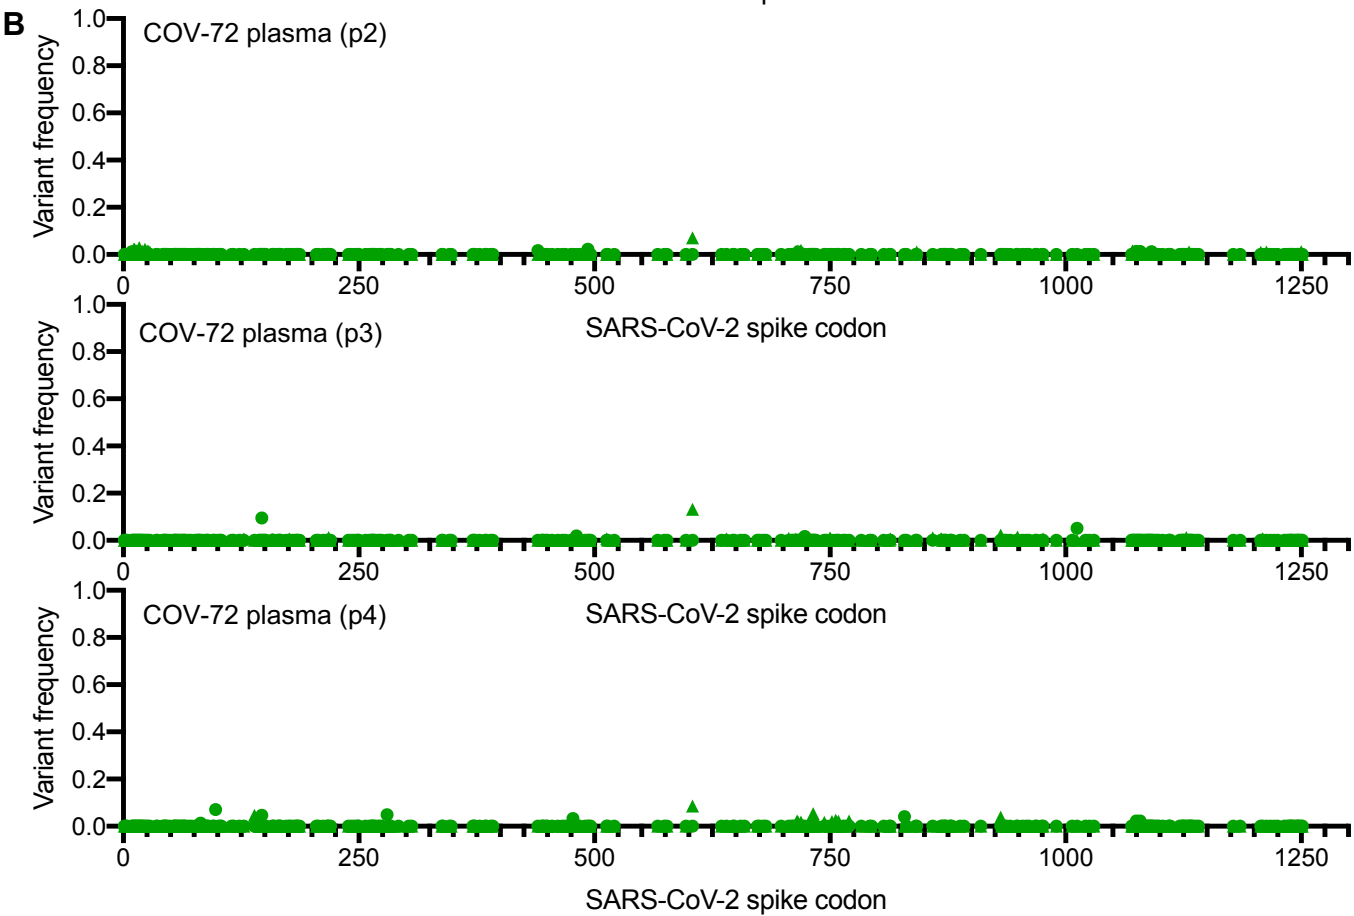

Supplement: supp [file elife-61312-supp-v1.zip]
